# Supplementary material for: Policy Resistance Undermines Superspreader Vaccination Strategies for Influenza
Source: PLOS journal article supplement (doi:10.1371/journal.pcbi.1002945), 2013-03-07
Supplement: S4 (10.1371/journal.pcbi.1002945.s004) [file journal.pcbi.1002945.s004]

| Strategy                 | % Useless | %Υ Used    |
|--------------------------|-----------|------------|
| PV + RV                  | 36.82%    | <i>N/A</i> |
| PV + NN                  | 37.43%    | <i>N/A</i> |
| PV + CV                  | 37.63%    | <i>N/A</i> |
| PV + INN                 | 38.58%    | <i>N/A</i> |
| PV + RV (NB)             | 43.49%    | <i>N/A</i> |
| PV + NN (NB)             | 44.63%    | <i>N/A</i> |
| PV + CV (NB)             | 45.08%    | <i>N/A</i> |
| PV + INN (NB)            | 47.38%    | <i>N/A</i> |
| PV + RV (\$20)           | 37.11%    | 57.02%     |
| PV + NN (\$20)           | 37.57%    | 56.61%     |
| PV + NN (\$20)*          | 37.34%    | 57.12%     |
| PV + CV (\$20)           | 38.01%    | 57.01%     |
| PV + INN (\$20)          | 39.31%    | 56.29%     |
| PV + INN (\$20)*         | 39.18%    | 57.10%     |
| PV + RV (\$50)           | 37.39%    | 71.11%     |
| PV + NN (\$50)           | 37.73%    | 70.77%     |
| PV + NN (\$50)*          | 37.33%    | 70.62%     |
| PV + CV (\$50)           | 38.34%    | 70.86%     |
| PV + INN (\$50)          | 39.85%    | 69.58%     |
| PV + INN (\$50) <i>t</i> | 39.49%    | 67.89%     |
