# Supplementary material for: Policy Resistance Undermines Superspreader Vaccination Strategies for Influenza
Source: PLOS journal article supplement (doi:10.1371/journal.pcbi.1002945), 2013-03-07
Supplement: S7 (10.1371/journal.pcbi.1002945.s007) [file journal.pcbi.1002945.s007]

| Strategy       | $I_{cost}$   | $V_{cost}$  | $\Upsilon_{cost}$ | Total        |
|----------------|--------------|-------------|-------------------|--------------|
| PV             | \$101,123.45 | \$69,968.98 | \$0.00            | \$171,092.43 |
| PV + RV        | \$96,814.46  | \$75,163.34 | \$0.00            | \$171,977.80 |
| PV + NN        | \$95,974.89  | \$74,307.91 | \$0.00            | \$170,282.80 |
| PV + CV        | \$95,994.61  | \$74,293.25 | \$0.00            | \$170,287.86 |
| PV + INN       | \$95,351.87  | \$73,443.82 | \$0.00            | \$168,795.69 |
| PV (NB)        | \$97,708.81  | \$70,239.57 | \$0.00            | \$167,948.38 |
| PV + RV (NB)   | \$75,403.22  | \$97,665.35 | \$0.00            | \$173,068.57 |
| PV + NN (NB)   | \$70,053.29  | \$97,116.51 | \$0.00            | \$167,169.80 |
| PV + CV (NB)   | \$70,399.56  | \$96,870.48 | \$0.00            | \$167,270.04 |
| PV + INN (NB)  | \$66,465.58  | \$95,767.50 | \$0.00            | \$162,233.08 |
| PV + RV \$20   | \$91,776.33  | \$81,049.27 | \$27,827.02       | \$200,652.62 |
| PV + NN \$20   | \$89,939.64  | \$79,087.34 | \$27,626.24       | \$196,653.22 |
| PV + NN \$20*  | \$92,470.28  | \$75,945.11 | \$13,937.53       | \$182,352.91 |
| PV + CV \$20   | \$90,135.70  | \$79,035.00 | \$27,822.40       | \$196,993.10 |
| PV + INN \$20  | \$88,335.36  | \$76,943.90 | \$27,467.32       | \$192,746.58 |
| PV + INN \$20* | \$90,924.69  | \$73,885.44 | \$13,932.77       | \$178,742.90 |
| PV + RV \$50   | \$87,977.25  | \$85,177.45 | \$86,753.29       | \$259,907.99 |
| PV + NN \$50   | \$85,070.74  | \$82,608.28 | \$86,342.32       | \$254,021.34 |
| PV + NN \$50*  | \$89,966.28  | \$77,068.94 | \$43,078.52       | \$210,113.74 |
| PV + CV \$50   | \$85,482.37  | \$82,491.13 | \$86,451.52       | \$254,425.02 |
| PV + INN \$50  | \$83,209.41  | \$79,930.13 | \$84,885.34       | \$248,024.88 |
| PV + INN \$50* | \$88,015.02  | \$74,140.18 | \$41,410.88       | \$203,566.08 |
